# Supplementary material for: Biocatalytic Janus membranes for CO2 removal utilizing carbonic anhydrase
Source: Royal Society of Chemistry journal article supplement (doi:10.1039/c5ta01756d), 2015-01-01
Supplement: c5ta01756d1.pdf [file c5ta01756d1.pdf]

## Electronic supplementary information

### Biocatalytic Janus membranes for CO<sub>2</sub> removal utilizing carbonic anhydrase

Jingwei Hou<sup>a</sup>, Chao Ji<sup>a,b</sup>, Guangxi Dong<sup>a,c</sup>, Bowen Xiao<sup>a</sup>, Yun Ye<sup>a</sup> and Vicki Chen<sup>a,c\*</sup>

<sup>a</sup>UNESCO Centre for Membrane Science and Technology, School of Chemical Engineering, The University of New South Wales, Sydney, Australia. Email: v.chen@unsw.edu.au; Tel: +61-2-93854813; Fax: +61-2-93855966

<sup>b</sup>Cooperative Research Centre for Polymers, Notting Hill, VIC 3168, Australia

<sup>c</sup>Cooperative Research Centre for Greenhouse Gas Technologies (CO<sub>2</sub>CRC), School of Chemical Engineering, The University of New South Wales, Sydney, Australia

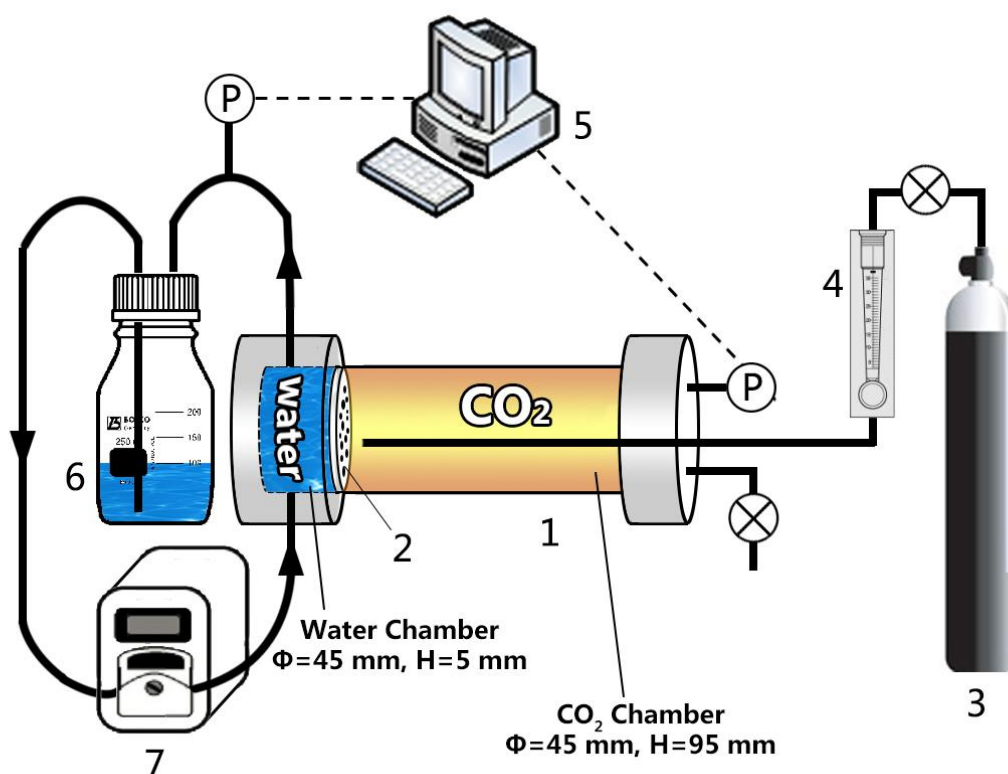

Figure SI-1. Schematic diagram of the membrane CO<sub>2</sub> hydration system. (1) membrane cell; (2) composite membrane; (3) gas cylinder; (4) gas flow meter; (5) computer; (6) liquid bottle; (7) peristaltic pump.

Table SI-1. Theoretical and actual CNTs loading on the coated membrane

| CNTs loading (mg) | Theoretical loading (wt %) | Actual loading (wt %) |
|-------------------|----------------------------|-----------------------|
| 5                 | 3.9                        | 3.6 ± 0.4             |
| 12.5              | 9.3                        | 9.5 ± 0.5             |
| 25                | 17.0                       | 16.3 ± 0.8            |
